# Supplementary material for: Synthesis and Structural Characterization of Phosphanide Gold(III)/Gold(I) Complexes and Their Thallium(III) and Gold(III) Precursors
Source: MDPI journal article supplement (doi:10.3390/molecules28010447), 2023-01-03
Supplement: s1 [file s1]

# Synthesis and Structural Characterization of Phosphanide Gold(III)/Gold(I) Complexes and Their Thallium(III) and Gold(III) Precursors

Laura Coconubo-Guio, José M. López-de-Luzuriaga \*, Sonia Moreno and M. Elena Olmos \*

Departamento de Química, Centro de Investigación en Síntesis Química (CISQ), Complejo Científico Tecnológico, Universidad de La Rioja, Madre de Dios 53, 26006 Logroño, Spain

\* Correspondence: josemaria.lopez@unirioja.es (J.M.L.-d.-L.), m-elena.olmos@unirioja.es (M.E.O.)

## Supplementary Material

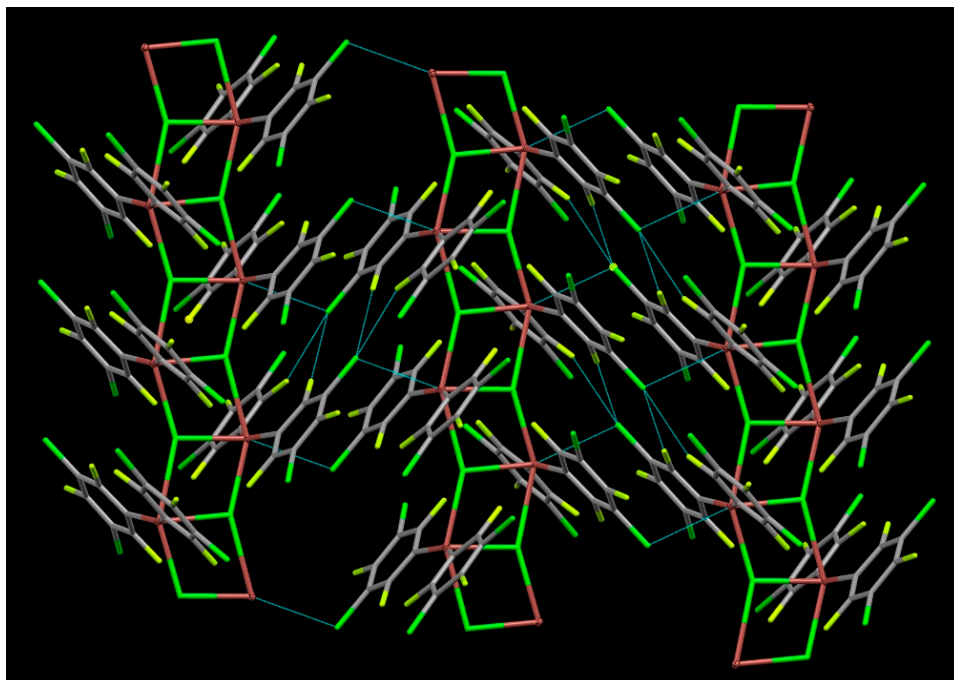

**Figure S1.** View of the 2D polymeric structure in  $[\text{Tl}(\text{3,5-C}_6\text{F}_3\text{Cl}_2)_2\text{Cl}]_n$  (**1**) formed through  $\text{Tl}\cdots\text{Cl}$  [3.4716(11) Å] and  $\text{Cl}\cdots\text{F}$  contacts [3.206(3) and 2.975(4) Å] seen from the crystallographic  $a$  axis. Color code: C, grey; Cl, green; F, light green; Tl, brown.

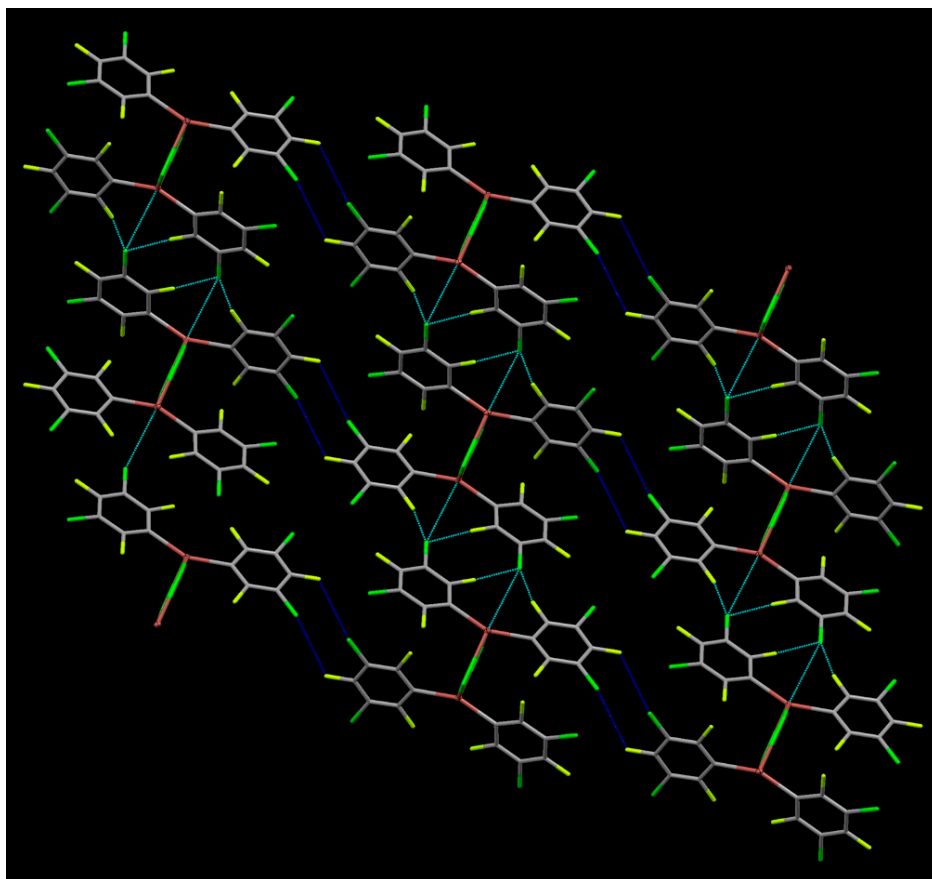

**Figure S2.** View of the 3D network in  $[\text{Tl}(\text{3,5-C}_6\text{F}_3\text{Cl}_2)_2\text{Cl}]_n$  (**1**) formed through  $\text{Cl}\cdots\text{F}$  contacts [3.193(4) Å] seen from the crystallographic  $b$  axis. Color code: C, grey; Cl, green; F, light green; Tl, brown.

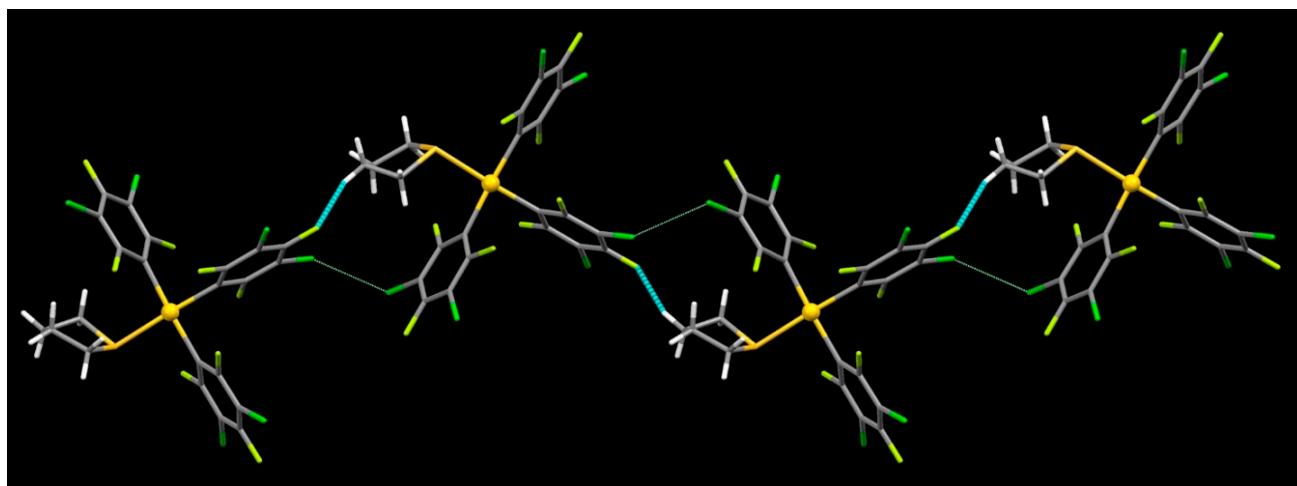

**Figure S3.** View of the 1D supramolecular structure in  $[\text{Au}(\text{3,5-C}_6\text{F}_3\text{Cl}_2)_3(\text{tht})]$  (**2**) formed through C-H...F hydrogen bonds and Cl...Cl contacts [3.4651(12) Å] seen from the crystallographic *a* axis. Color code: C, grey; H, white; Au, yellow; Cl, green; F, light green; S, orange.

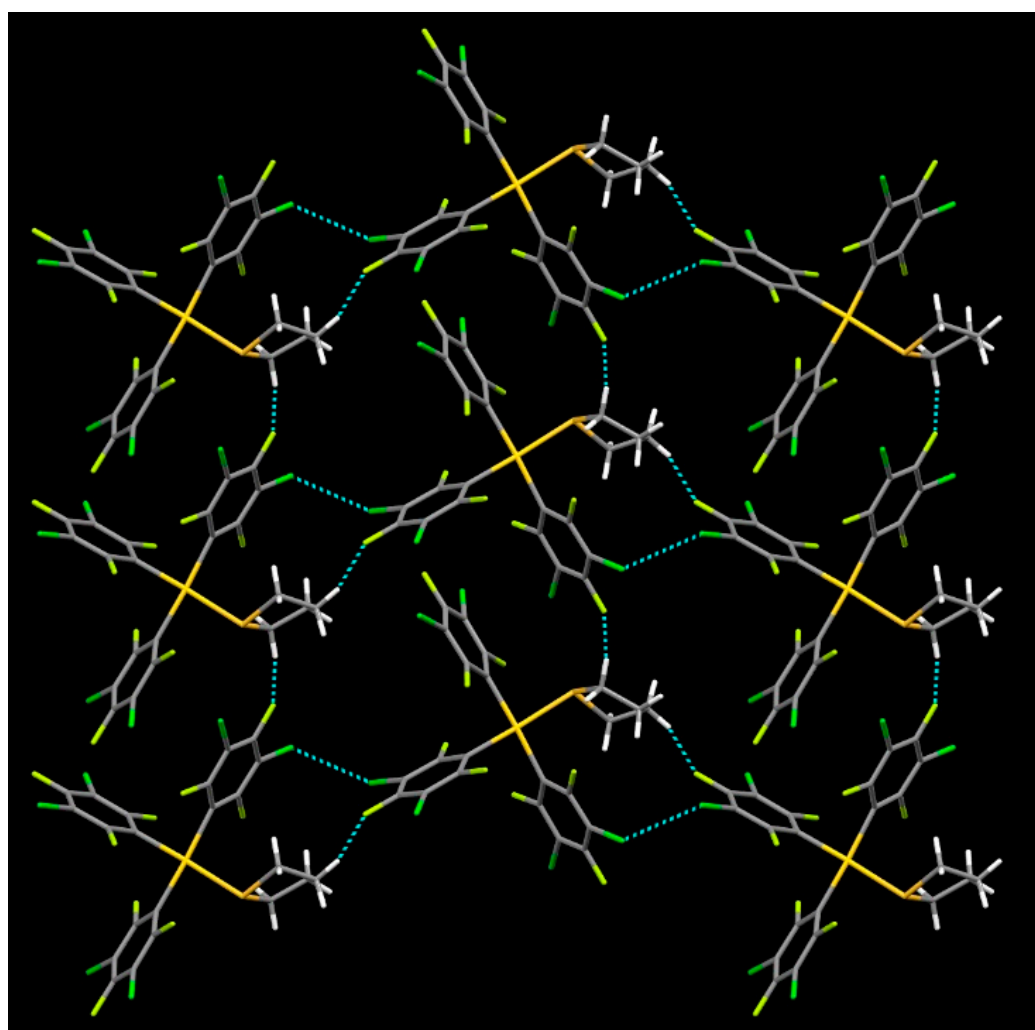

**Figure S4.** View of the 2D network in  $[\text{Au}(\text{3,5-C}_6\text{F}_3\text{Cl}_2)_3(\text{tht})]$  (**2**) formed through C-H...F hydrogen bonds seen from the crystallographic *c* axis. Color code: C, grey; H, white; Au, yellow; Cl, green; F, light green; S, orange.

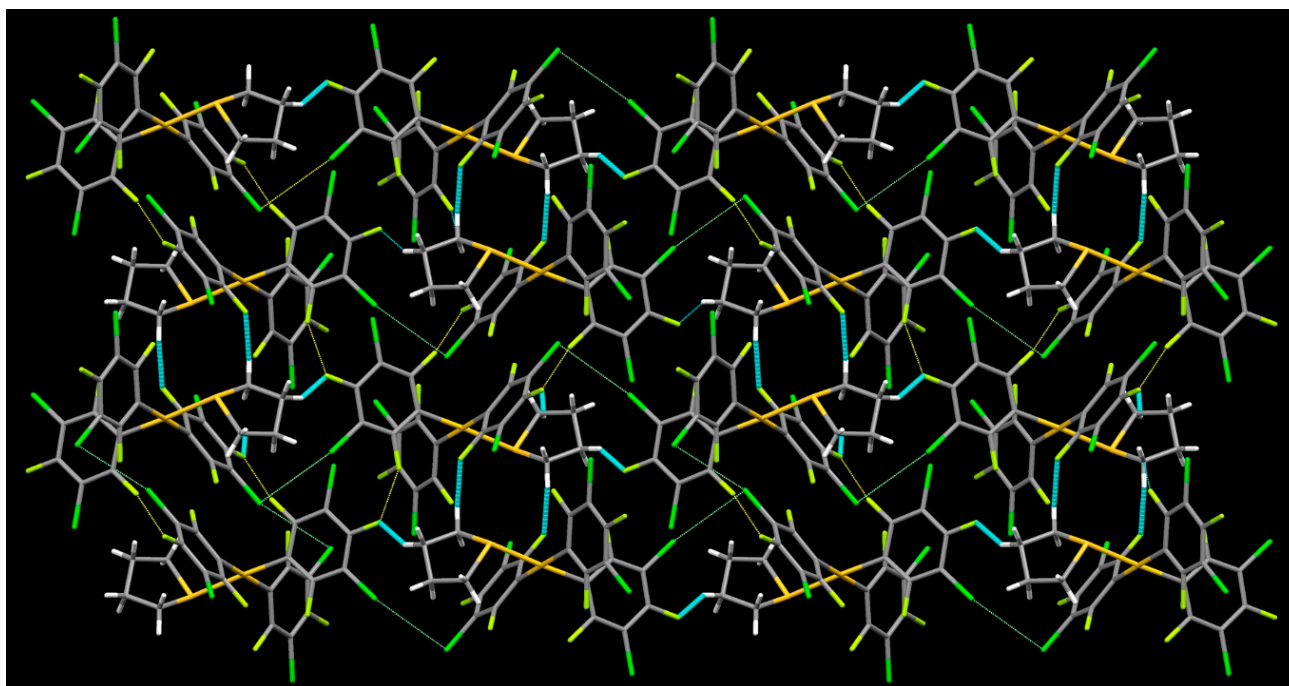

**Figure S5.** View of the 3D network in  $[\text{Au}(3,5\text{-C}_6\text{F}_3\text{Cl}_2)_3(\text{tht})]$  (**2**) formed through C-H $\cdots$ F hydrogen bonds. Color code: C, grey; H, white; Au, yellow; Cl, green; F, light green; S, orange.

**Table S1.** Hydrogen bond lengths ( $\text{\AA}$ ) and angles ( $^\circ$ ) for  $[\text{Au}(3,5\text{-C}_6\text{F}_3\text{Cl}_2)_3(\text{tht})]$  (**2**).

| D-H $\cdots$ A               | d(D-H) | d(H $\cdots$ A) | d(D $\cdots$ A) | $\angle(\text{DHA})$ |
|------------------------------|--------|-----------------|-----------------|----------------------|
| C(22)-H(22A) $\cdots$ F(8)#1 | 0.99   | 2.46            | 3.324(4)        | 145.7                |
| C(19)-H(19B) $\cdots$ F(9)#2 | 0.99   | 2.37            | 3.123(4)        | 132.1                |
| C(20)-H(20A) $\cdots$ F(5)#3 | 0.99   | 2.46            | 3.350(4)        | 149.5                |

Symmetry transformations used to generate equivalent atoms:

#1  $x+1, y, z$  #2  $-x+1, -y+1, -z+1$  #3  $-x+1/2, y+1/2, -z+1/2$

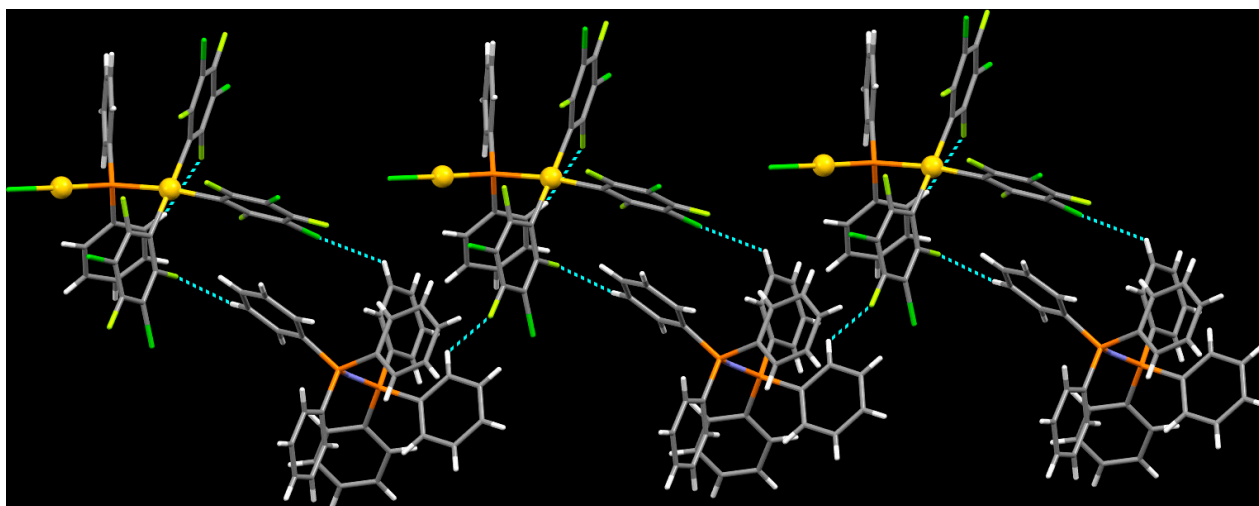

**Figure S6.** View of the 1D supramolecular structure in PPN[Au(3,5-C<sub>6</sub>Cl<sub>2</sub>F<sub>3</sub>)<sub>3</sub>(μ-PPh<sub>2</sub>)AuCl] (**4**) formed through C-H...F and C-H...Cl hydrogen bonds. Color code: C, grey; H, white; Au, yellow; Cl, green; F, light green; N, violet; P, orange.

**Table S2** Hydrogen bond lengths (Å) and angles (°) for PPN[Au(3,5-C<sub>6</sub>Cl<sub>2</sub>F<sub>3</sub>)<sub>3</sub>(μ-PPh<sub>2</sub>)AuCl] (**4**).

| D-H...A               | d(D-H) | d(H...A) | d(D...A) | <(DHA) |
|-----------------------|--------|----------|----------|--------|
| C(30)-H(30)...F(1)    | 0.93   | 2.47     | 3.352(8) | 159.1  |
| C(42)-H(42)...F(13)#1 | 0.93   | 2.51     | 3.208(7) | 132.4  |
| C(35)-H(35)...Cl(7)#2 | 0.93   | 2.88     | 3.533(8) | 128.2  |
| C(57)-H(57)...F(11)#2 | 0.93   | 2.60     | 3.474(8) | 156.8  |

Symmetry transformations used to generate equivalent atoms:

#1 x+1,y,z #2 x+1,y-1,z

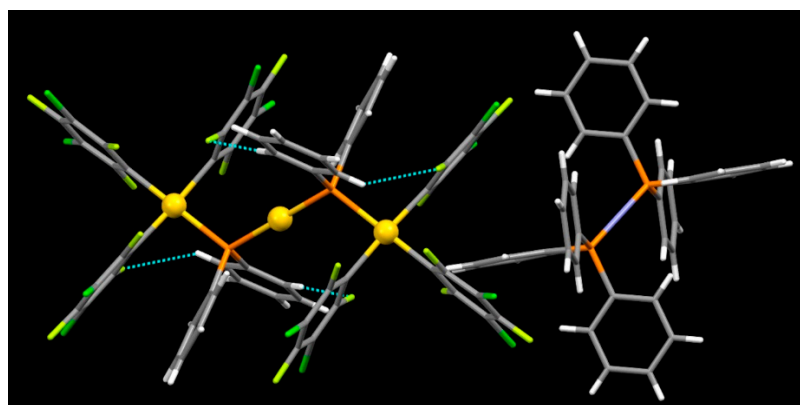

**Figure S7.** View of the molecular structure of the ions in PPN[{(3,5-C<sub>6</sub>Cl<sub>2</sub>F<sub>3</sub>)<sub>3</sub>Au(μ-PPh<sub>2</sub>)<sub>2</sub>Au}] (**5**) showing the intramolecular C-H...F hydrogen bonds. Color code: C, grey; H, white; Au, yellow; Cl, green; F, light green; N, violet; P, orange.

**Table S3.** Hydrogen bond lengths (Å) and angles (°) for PPN[{(3,5-C<sub>6</sub>Cl<sub>2</sub>F<sub>3</sub>)<sub>3</sub>Au(μ-PPh<sub>2</sub>)<sub>2</sub>Au}] (**5**).

| D-H...A              | d(D-H) | d(H...A) | d(D...A) | <(DHA) |
|----------------------|--------|----------|----------|--------|
| C(20)-H(20)...F(9)#1 | 0.95   | 2.52     | 3.462(6) | 171.1  |
| C(24)-H(24)...F(1)   | 0.95   | 2.62     | 3.427(6) | 143.7  |

Symmetry transformations used to generate equivalent atoms:

#1 -x+1,-y+1,-z+1 #2 -x+1,-y,-z+2
